# Supplementary material for: Distinct reconstruction of aluminum-doped oxide-derived copper enhances the selectivity of C2+ products in CO2 electroreduction
Source: Royal Society of Chemistry journal article supplement (doi:10.1039/d3ta02375c), 2023-01-01
Supplement: d3ta02375c1.pdf [file d3ta02375c1.pdf]

## Electronic Supplementary Information

### **Distinct reconstruction of aluminum-doped oxide-derived copper enhances selectivity of C<sub>2+</sub> products in CO<sub>2</sub> electroreduction**

Junghwan Jang,<sup>‡a,b</sup> Kangjae Lee,<sup>‡a,b</sup> Heejong Shin,<sup>a,b</sup> Hyeon Seok Lee,<sup>a,b</sup> Byoung-Hoon Lee,<sup>a,b</sup>

Juwon Jeong,<sup>a,b</sup> Jungho Kim,<sup>c</sup> Wonchan Hwang,<sup>a,b</sup> SungBin Park,<sup>a,b</sup> Megalamane S.

Bootharaju,<sup>a,b</sup> Seoin Back,<sup>c</sup> Jaehyuk Shim,<sup>a,b</sup> Jeong Hyun Kim,<sup>a</sup> Taeghwan Hyeon,<sup>\*a,b</sup> and

Yung-Eun Sung<sup>\*a,b</sup>

<sup>a</sup>Center for Nanoparticle Research, Institute for Basic Science (IBS), Seoul 08826, Republic of Korea.

<sup>b</sup>School of Chemical and Biological Engineering, Seoul National University, Seoul 08826, Republic of Korea.

<sup>c</sup>Department of Chemical and Biomolecular Engineering, Institute of Emergent Materials, Sogang University, Seoul, 04107, Republic of Korea

‡ These authors contributed equally to this work.

\*Corresponding authors. E-mail: [thyeon@snu.ac.kr](mailto:thyeon@snu.ac.kr) (T. Hyeon), [ysung@snu.ac.kr](mailto:ysung@snu.ac.kr) (Y. -E. Sung)

## Experimentals

### Materials

Copper(II) nitrate trihydrate ( $\text{Cu}(\text{NO}_3)_2 \cdot 3\text{H}_2\text{O}$ , 99-104%), Trimesic acid ( $\text{C}_6\text{H}_3(\text{CO}_2\text{H})_3$ , 95%), Aluminum acetylacetonate ( $\text{Al}(\text{acac})_3$ , 99%), potassium bicarbonate ( $\text{KHCO}_3$ ,  $\geq 99.5\%$ ), potassium hydroxide ( $\text{KOH}$ ,  $\geq 85\%$ ), potassium sulfate ( $\text{K}_2\text{SO}_4$ ,  $\geq 99.0\%$ ), 5 wt% Nafion solution, benzotriazole ( $\text{C}_6\text{H}_5\text{N}_3$ , 99%), sodium perchlorate ( $\text{NaClO}_4$ ,  $\geq 98\%$ ), perchloric acid ( $\text{HClO}_4$ , 70%), and lead(II) perchlorate hydrate ( $\text{PbClO}_4 \cdot x\text{H}_2\text{O}$ ,  $\geq 99.995\%$ ) were purchased from Sigma-Aldrich. Methanol and isopropanol ( $\geq 99.9\%$ ) were provided by Samchun chemicals (Republic of Korea).

### Synthesis of HKUST-1 and HKUST-1 ( $\text{Al}_{0.35}$ )

For the synthesis of HKUST-1, it was slightly changed from previous methods.<sup>1</sup> 875 mg of trimesic acid was dissolved in 40 ml methanol to make solution A. 2416 mg of  $\text{Cu}(\text{NO}_3)_2 \cdot 3\text{H}_2\text{O}$  (10 mmol) was dissolved in 40 ml methanol to make solution B. Then, the two solutions were mixed, stirred at 700 rpm for 1 h, and kept overnight at room temperature. The as-obtained precipitate was centrifuged with methanol 3 times to remove excess copper ions and trimesic acid. Finally, the product was dried in a vacuum oven overnight. HKUST-1 ( $\text{Al}_{0.35}$ ) was synthesized in the same procedure except that 113 mg of  $\text{Al}(\text{acac})_3$  (0.35 mmol) was additionally dissolved in solution B.

### Synthesis of CuO and CuO\_Al

To prepare CuO, HKUST-1 was heated at 400 °C for 1 h in a muffle furnace at a

5 °C/min ramp rate under the air. Preparation of CuO<sub>2</sub>-Al was following the same procedure using HKUST-1 (Al<sub>0.35</sub>). After annealing, both catalysts are ground in a mortar.

### **Materials characterizations**

Transmission electron microscopy (TEM) imaging, high-resolution transmission electron microscopy (HRTEM) imaging, and scanning transmission electron microscopy (STEM) imaging with energy-dispersive X-ray spectroscopy (EDS) mapping were carried out on a transmission electron microscope (JEM-2100F, JEOL) equipped with a single drift detector (X-MAXN, Oxford Instruments) at 200 kV. Scanning electron microscopy (SEM) imaging was performed on a scanning electron microscope (SUPRA 55-VP, Carl Zeiss) at 2 kV. Thermogravimetric analysis (TGA) was conducted by a thermogravimetric analyzer (SDT-Q600, TA instruments) in the air at a ramp rate of 10 °C min<sup>-1</sup> and flow rate of 10 ml min<sup>-1</sup>. X-ray diffraction (XRD) patterns of samples on carbon paper were obtained on an X-ray diffractometer (Smartlab XRD, Rigaku) with Cu K<sub>α</sub> radiation in the range of 20-80° (2θ) with a step size of 0.01°. X-ray photoelectron spectroscopy (XPS) spectra were acquired on an X-ray photoelectron spectrometer (K-alpha, Thermo Fisher Scientific) with Al K<sub>α</sub> radiation and the C<sub>1s</sub> peak was calibrated at 284.6 eV. X-ray absorption fine structure (XAFS) measurement at Cu K-edge was conducted at the 8C beamline of Pohang Accelerator Laboratory (PAL, Republic of Korea). Cu foil was used to calibrate Cu K-edge energy (E<sub>0</sub>=8978.9 eV) and fluorescence yield detection was used to gain Cu K-edge spectra. IFEFFIT package including ATHENA and Artemis was used to process XAFS spectra and fitting of EXAFS spectra. Concentrations of Cu and Al in the sample were measured by an inductively coupled plasma atomic emission spectrometer (OPTIMA 8300, Perkin-Elmer) installed at the National Center for Inter-university Research Facilities (NCIRF) of Seoul National University.

## **Electrodes preparation**

To prepare electrodes, catalyst ink was spray-coated onto the gas-diffusion layer (GDL). 10 mg of the catalyst was mixed with 20  $\mu\text{l}$  of 5 wt% Nafion solution and 3 ml of isopropanol solvent. The catalyst ink was sonicated for 30 min to form a homogeneous suspension and spray-coated onto a gas diffusion layer (JNT30-A6H, JNTG Co., Republic of Korea) using an airbrush (Hi-Line HP-CH, ANEST IWATA). The gas diffusion electrode (GDE) was dried in an oven at 60  $^{\circ}\text{C}$  overnight. The GDE before and after catalyst loading was weighed to determine the loading amount and it was approximately 0.5  $\text{mg cm}^{-2}$ .

## **Electrochemical measurements**

All of the electrochemical measurements were performed in a custom-made flow cell with a three-electrode system connected to an electrochemical workstation (PGSTAT302N, Metrohm Autolab). The GDE, a Ni foam (Alantum Co., Republic of Korea) electrode, and Ag/AgCl electrode (RE-1CP, ALS Co., Japan) filled with saturated KCl solution were used as working, counter, and reference electrodes, respectively. 1M  $\text{KHCO}_3$  was used as the catholyte and anolyte, which were separated by an anion exchange membrane (Sustainion<sup>®</sup> X37-50 Grade RT membrane, Dioxide Materials). Both electrolytes were circulated through each compartment of the flow cell at 20 sccm by using a dual-channel peristaltic pump (Masterflex L/S series, Cole-Parmer). High-purity  $\text{CO}_2$  (5N, KS TECH Co., Republic of Korea) was purged at 30 sccm to the cathode chamber and passed through the catalyst layer from the backside of GDE. Before all of the electrochemical measurements, samples were electrochemically reduced to OD-Cu by applying 1 mA for 15 min under Argon (Ar) conditions.

$\text{eCO}_2\text{RR}$  performance was measured under galvanostatic conditions, applying reductive currents from 100 mA to 700 mA with a 100-mA step. The linear sweep voltammetry

(LSV) was conducted at a scan rate of 10 mV s<sup>-1</sup> in the potential range from -0.1 V to -0.9 V (vs. RHE). The stability test was performed at 300 mA with the same configurations but a small amount of 1M KHCO<sub>3</sub> electrolyte was continuously added to the catholyte for suppressing pH change in the catholyte. The electrochemical impedance spectroscopy (EIS) was carried out on electrochemically reduced OD-Cu samples at 10 mA in the frequency range from 10<sup>5</sup> to 0.1 Hz. Nyquist plots were obtained from EIS measurement and were fitted by Zview software (Scribner Associates). Ohmic drop by solution resistance was corrected for all of the electrochemical measurements. The Nova software and FRA2 module (Metrohm Autolab) were used to correct 85% of ohmic drop and uncompensated ohmic drop was corrected manually. All potentials were converted to the reversible hydrogen electrode (RHE) scale by equation (1).<sup>2</sup>

$$E \text{ (vs. RHE)} = E \text{ (vs. Ag/AgCl)} + 0.197 \text{ V} + 0.05916 \times \text{pH} \quad (1)$$

## **Product analysis**

The gas products and liquid products were quantified by gas chromatography (GC) and <sup>1</sup>H nuclear magnetic resonance (<sup>1</sup>H NMR). The cathode compartment of the flow cell is connected to GC (7890B, Agilent), so effluent streams from eCO<sub>2</sub>RR were routed into the gas sampling loop of the GC. Gas products in effluent streams were analyzed by a flame ionization detector and thermal conductivity detector. Catholyte after eCO<sub>2</sub>RR was mixed with D<sub>2</sub>O and sodium 2,2-Dimethyl-2-silapentane-5-sulfonate (DSS) as an internal standard. Then the sample is analyzed by <sup>1</sup>H NMR spectrometer (AVANCE III 600, Bruker) with water suppression. The amounts of the products resulting from GC and <sup>1</sup>H NMR were used to calculate the Faradaic efficiency (FE) of products with the following equation:<sup>3</sup>

$$\text{FE (\%)} = \frac{\text{amount of the product} \times n \times F}{C} \times 100 \quad (2)$$

where  $n$  is the number of electrons participating in the Faradaic reaction to produce one molecule,  $F$  is the Faraday constant (96485 C mol<sup>-1</sup>), and  $C$  is the quantity of charge participating in the Faradaic reaction.

For gas and liquid products, equation (2) can be expressed as following equations: <sup>4</sup>

$$\text{FE}_{\text{gas}} (\%) = x_i \times v \times \frac{P_0}{RT} \times \frac{n_i \times F}{I_{\text{total}}} \times 100 \quad (3)$$

$$\text{FE}_{\text{liquid}} (\%) = \frac{N_i \times n_i \times F}{I_{\text{total}} \times \Delta t} \times 100 \quad (4)$$

where  $x_i$  is the volume fraction of gas product  $i$ ,  $v$  is the gas flow rate entering the GC sampling loop,  $P_0$  is the ambient pressure,  $R$  is the gas constant,  $T$  is the temperature,  $n_i$  is the number of electrons participating in the Faradaic reaction to produce one molecule of the product  $i$ ,  $I_{\text{total}}$  is the total current of Faradaic reaction,  $N_i$  is the amount of product  $i$  produced per reaction time  $\Delta t$ . The products contain H<sub>2</sub>, CO, HCOOH, CH<sub>4</sub>, C<sub>2</sub>H<sub>4</sub>, C<sub>2</sub>H<sub>5</sub>OH, CH<sub>3</sub>COOH, and C<sub>3</sub>H<sub>7</sub>OH.

### **Cu passivation**

Cu passivation with benzotriazole (BTA) was carried out by replacing the catholyte with BTA solution right after eCO<sub>2</sub>RR. The BTA solution is made by saturating BTA in 1M KHCO<sub>3</sub> solution and purging Ar gas for sufficient time to remove oxygen in the solution.

### **ECSA measurement**

Lead underpotential deposition (Pb UPD) and double-layer capacitance method were performed to measure the electrochemically active surface area (ECSA).

For Pb UPD, a 100 mM NaClO<sub>4</sub> electrolyte with 10 mM HClO<sub>4</sub> and 3 mM Pb(ClO<sub>4</sub>)<sub>2</sub> was made and used as the electrolyte.<sup>5</sup> The electrolyte was purged with Ar and the samples were electrochemically reduced before Pb UPD. The Hg/Hg<sub>2</sub>SO<sub>4</sub> electrode (5100A, Koslow Scientific Co.) with saturated potassium sulfate was used as the reference electrode to exclude the influence of chloride ion on Pb UPD.<sup>6</sup> Cyclic voltammetry was conducted from -0.84 to -0.49 V (vs. Hg/Hg<sub>2</sub>SO<sub>4</sub>) at the scan rate of 10 mV s<sup>-1</sup> and it was repeated until the two consecutive scan cycles coincided. The anodic peak of the last scan cycle (Pb stripping peak) was integrated and divided by the area of Cu foil and the loading amount to determine ECSA (m<sup>2</sup> g<sub>Cu</sub><sup>-1</sup>).

For double-layer capacitance measurement, Ar-purged 1 M KHCO<sub>3</sub> electrolyte was used as the electrolyte and samples were electrochemically reduced before measurement. The same configurations were used and cyclic voltammetry (CV) was conducted from 0.225 to 0.325 V (vs. RHE) at the scan rates of 10, 15, 20, 25, 30, 35, and 40 mV s<sup>-1</sup>. It was also repeated until the two consecutive scan cycles coincided. The capacitance was calculated by following equation:<sup>7</sup>

$$\frac{I_a - I_c}{2} = C\nu \quad (5)$$

where  $I_a$  is the anodic current at 0.325 V (vs. RHE),  $I_c$  is the cathodic current at 0.225 V (vs. RHE),  $C$  is the capacitance, and  $\nu$  is the scan rate. The capacitance can be derived by plotting the left side of equation (5) against the scan rate. The ECSA is proportional to the capacitance.

## **Contact angle measurement**

The contact angle was measured by droplet on the sample. The contact angle of the droplet was measured by an optical contact angle measurement system (Phoenix-MT series, SEO Co., Republic of Korea) at room temperature. The spray-coated electrodes were used as samples and the volume of water drop was 4  $\mu\text{l}$ . The contact angle was averaged by measuring five different positions of the same sample. The electrodes after eCO<sub>2</sub>RR were rinsed with deionized water and dried in an oven overnight.



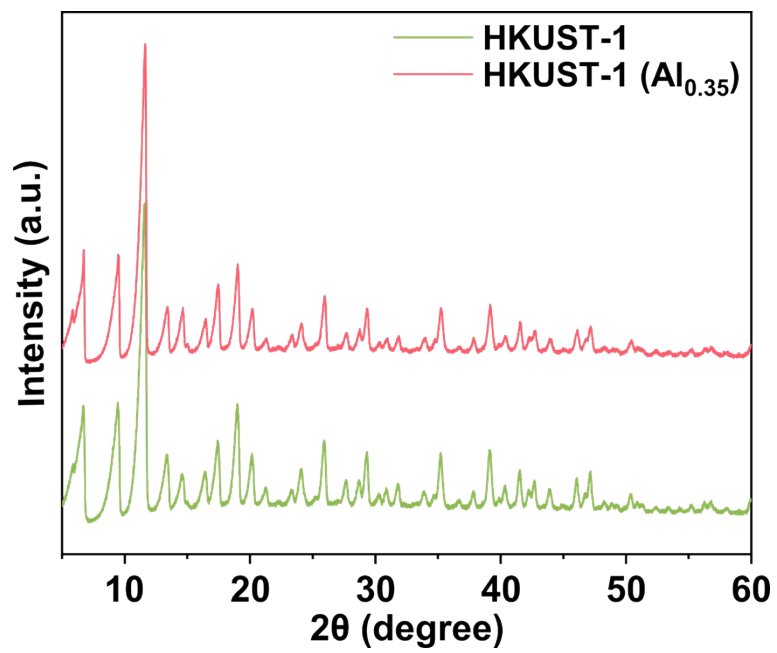

**Figure S1.** XRD patterns of HKUST-1 and HKUST-1 with Al precursor before calcination.

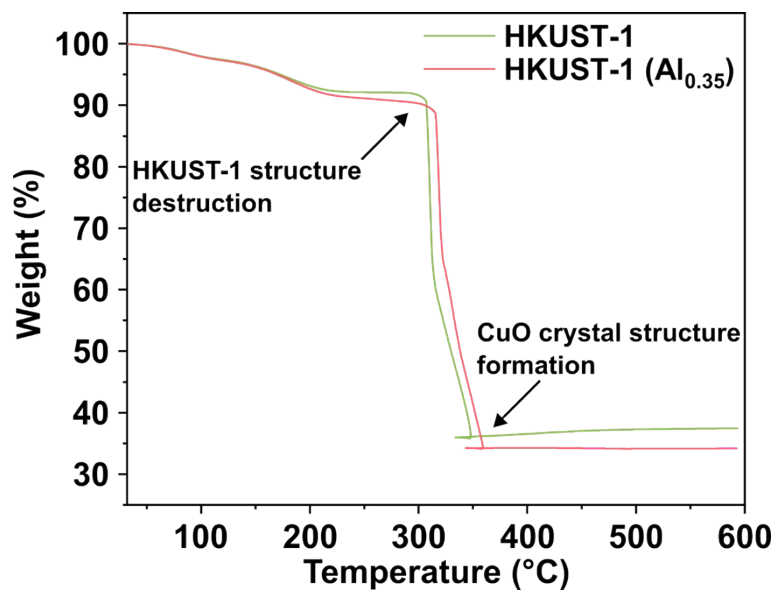

**Figure S2.** TGA curves of HKUST-1 and HKUST-1 with Al precursor at a ramp rate of 10 °C min<sup>-1</sup>.

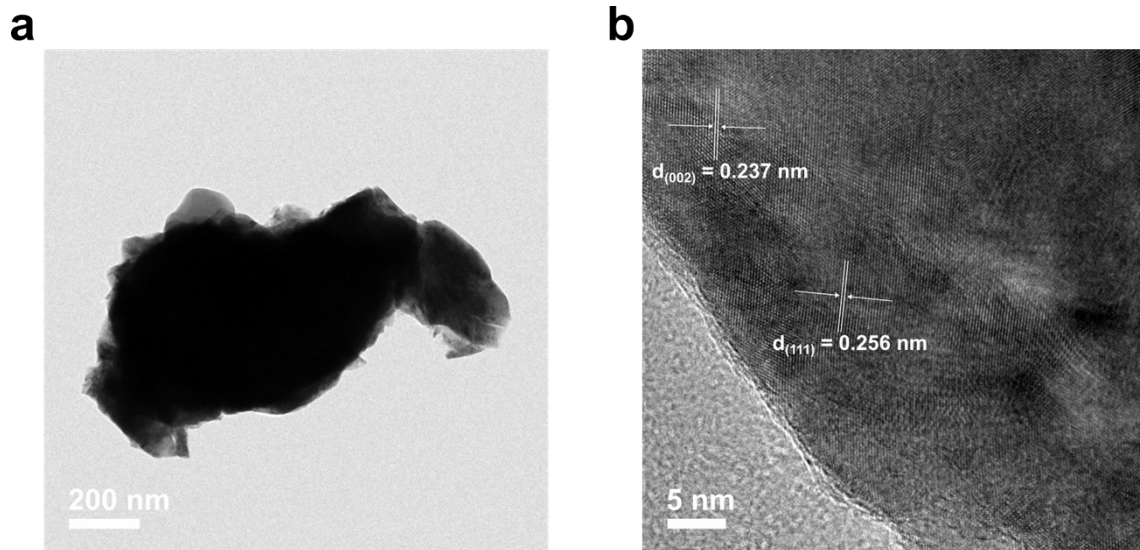

**Figure S3.** (a) TEM and (b) HRTEM image of CuO after synthesis.

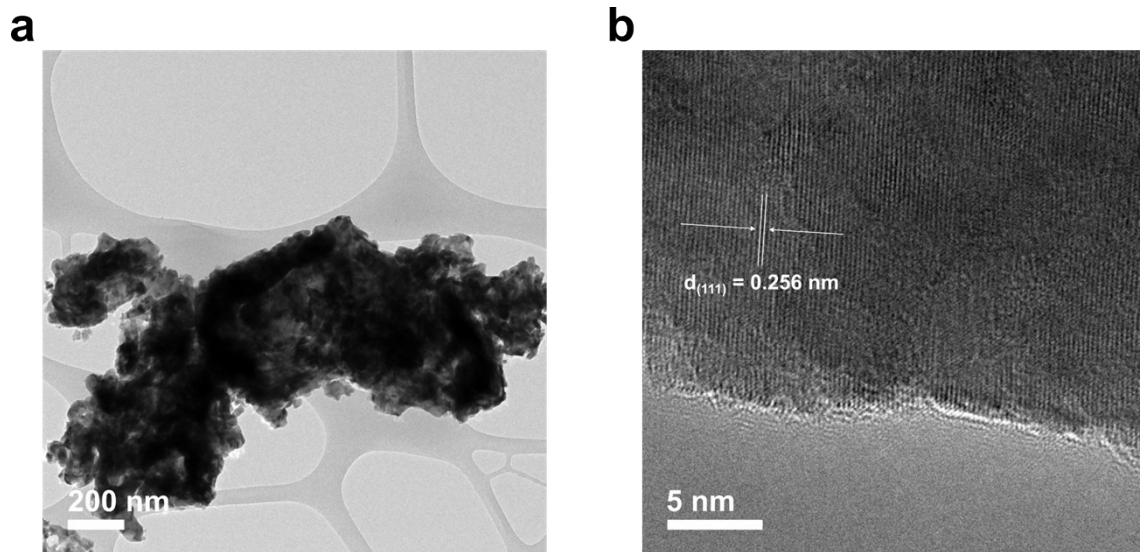

**Figure S4.** (a) TEM and (b) HRTEM image of CuO<sub>x</sub>Al after synthesis.

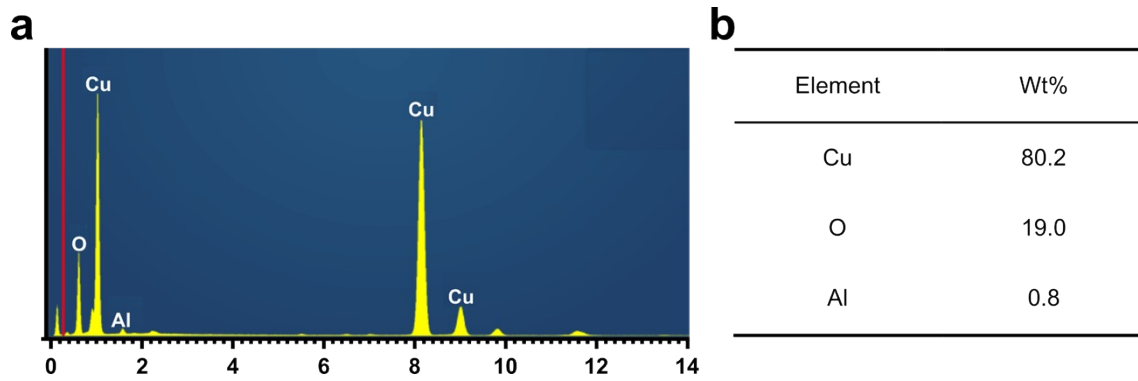

**Figure S5.** (a) EDS spectrum of CuO<sub>2</sub>Al from STEM-EDS and (b) its calculated chemical composition.

| Element | Concentration(ppm) | Wt%    | At%   |
|---------|--------------------|--------|-------|
| Cu      | 839890.21          | 99.19  | 98.10 |
| Al      | 6894.51            | 0.81   | 1.90  |
| Cu/Al   | -                  | 121.82 | 51.72 |

**Table S1.** Concentration and chemical composition of Cu and Al in CuO\_Al analyzed by ICP-AES.

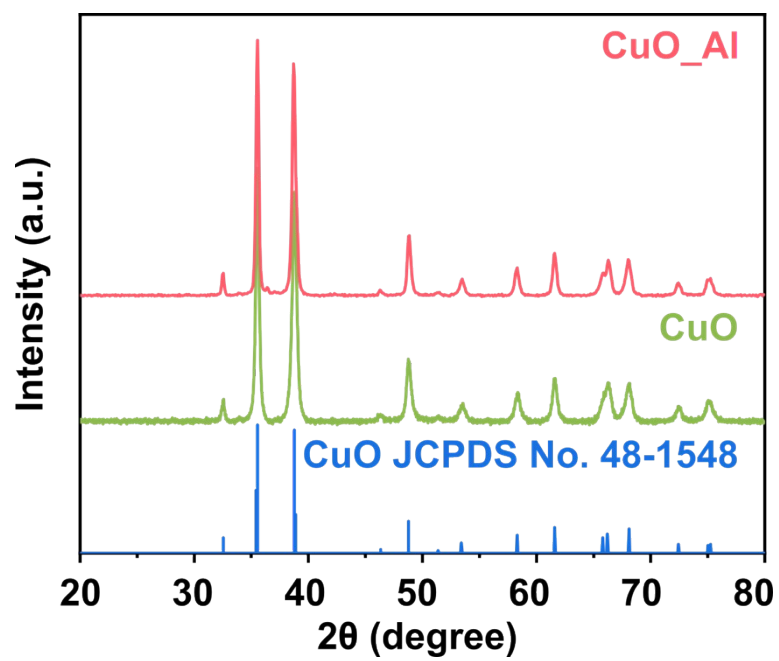

Figure S6. XRD patterns of CuO and CuO<sub>Al</sub> after synthesis.

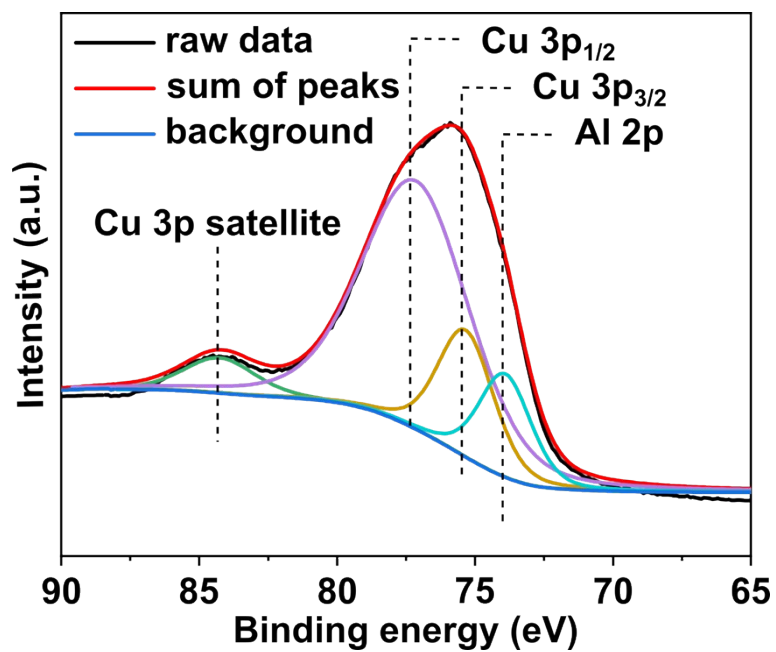

**Figure S7.** Deconvoluted XPS spectra of Al 2p for CuO<sub>2</sub>/Al. Deconvolution was carried out with the XPSpeak41 program, fixing %GL (gaussian and Lorentzian percentage) and peak position.



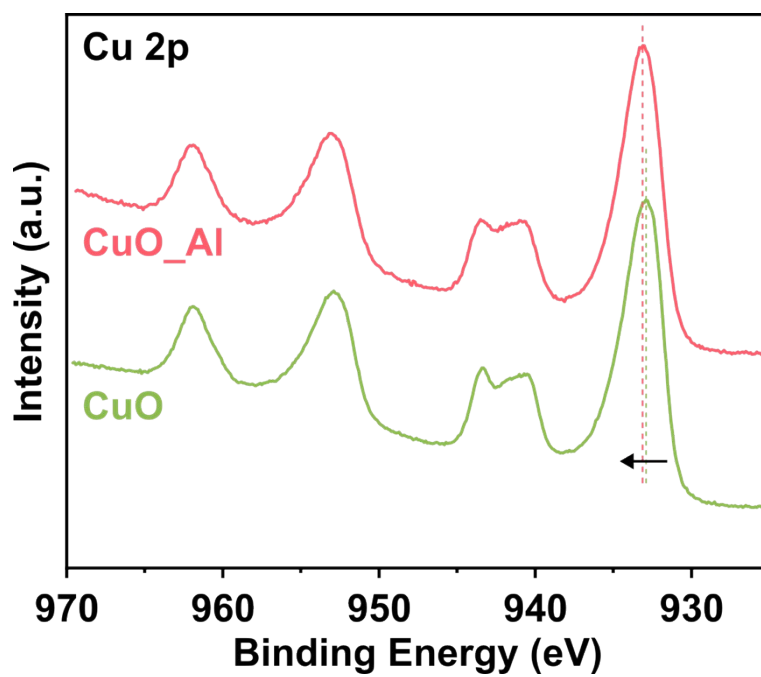

**Figure S8.** XPS spectra of Cu 2p for both catalysts. Dashed lines indicate Cu 2p<sub>3/2</sub> peak positions.

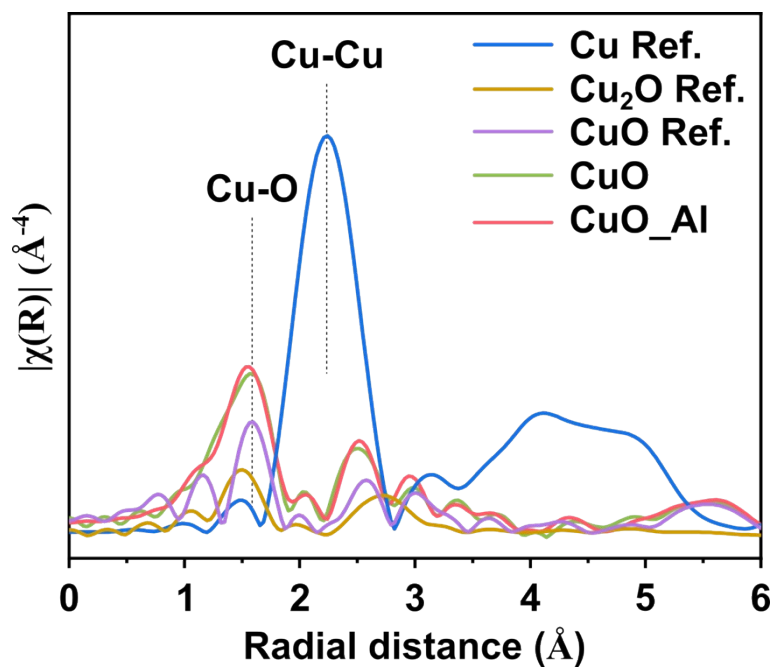

**Figure S9.** Cu K-edge FT-EXAFS spectra of both catalysts and reference samples. Dashed lines indicate the positions of Cu-O and Cu-Cu peaks.

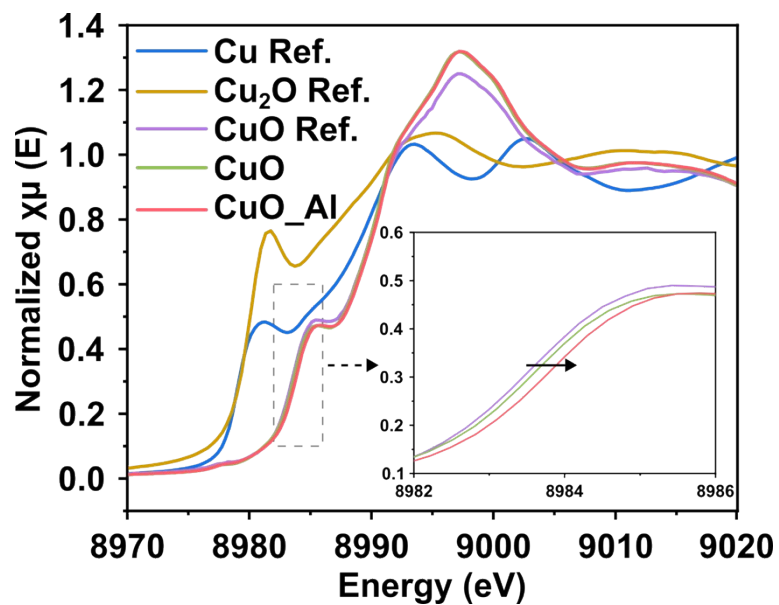

**Figure S10.** Cu K-edge XANES spectra of both catalysts and reference Cu foil. The insets magnify the absorption edge of both catalysts.

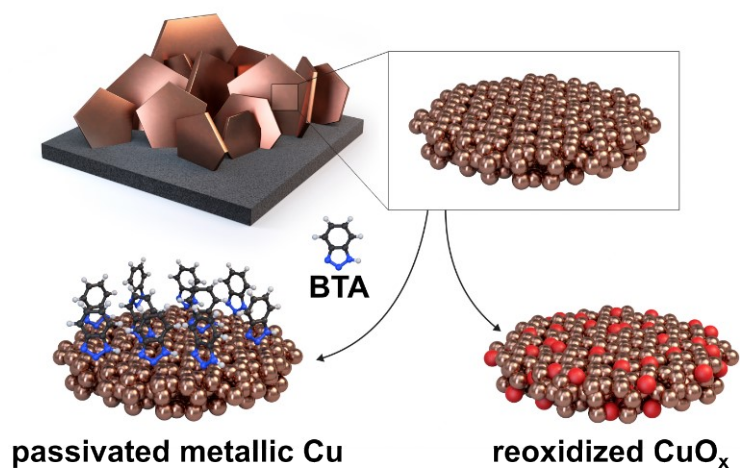

**Figure S11.** Schematic illustration of Cu passivation by BTA.

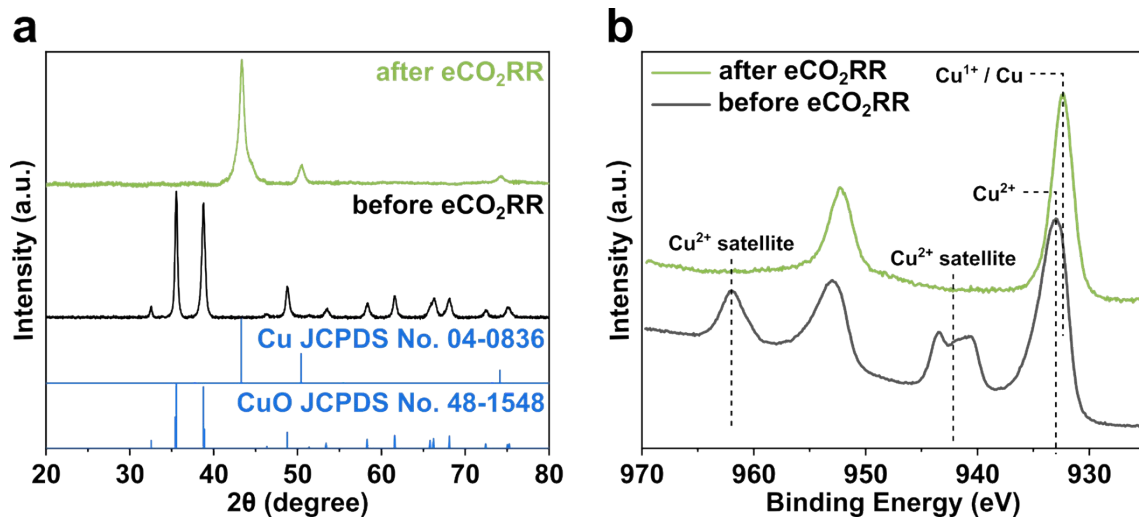

**Figure S12.** (a) XRD patterns and Cu 2p XPS spectra of CuO before and after eCO<sub>2</sub>RR.

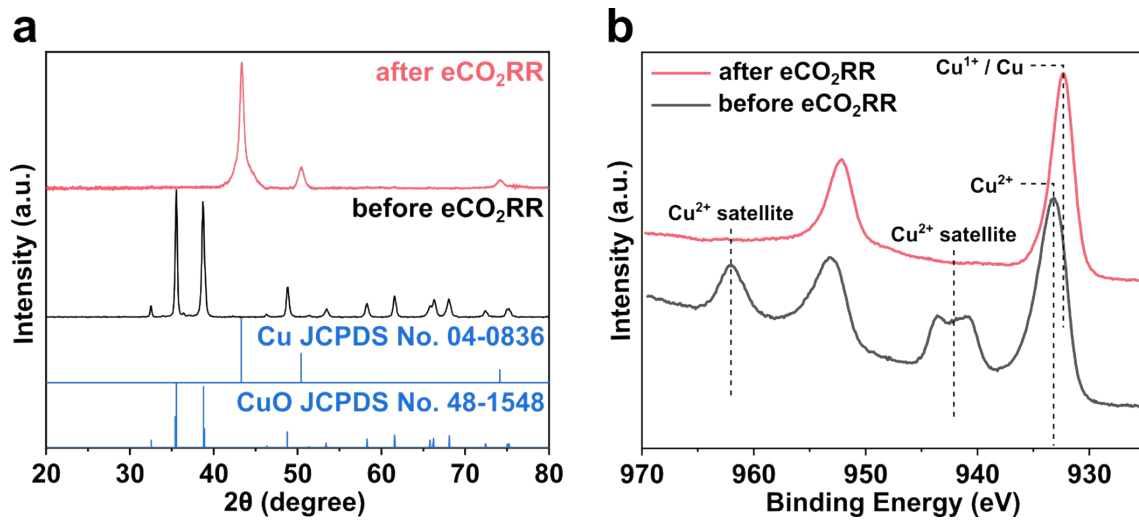

**Figure S13.** (a) XRD patterns and Cu 2p XPS spectra of CuO\_A1 before and after eCO<sub>2</sub>RR.

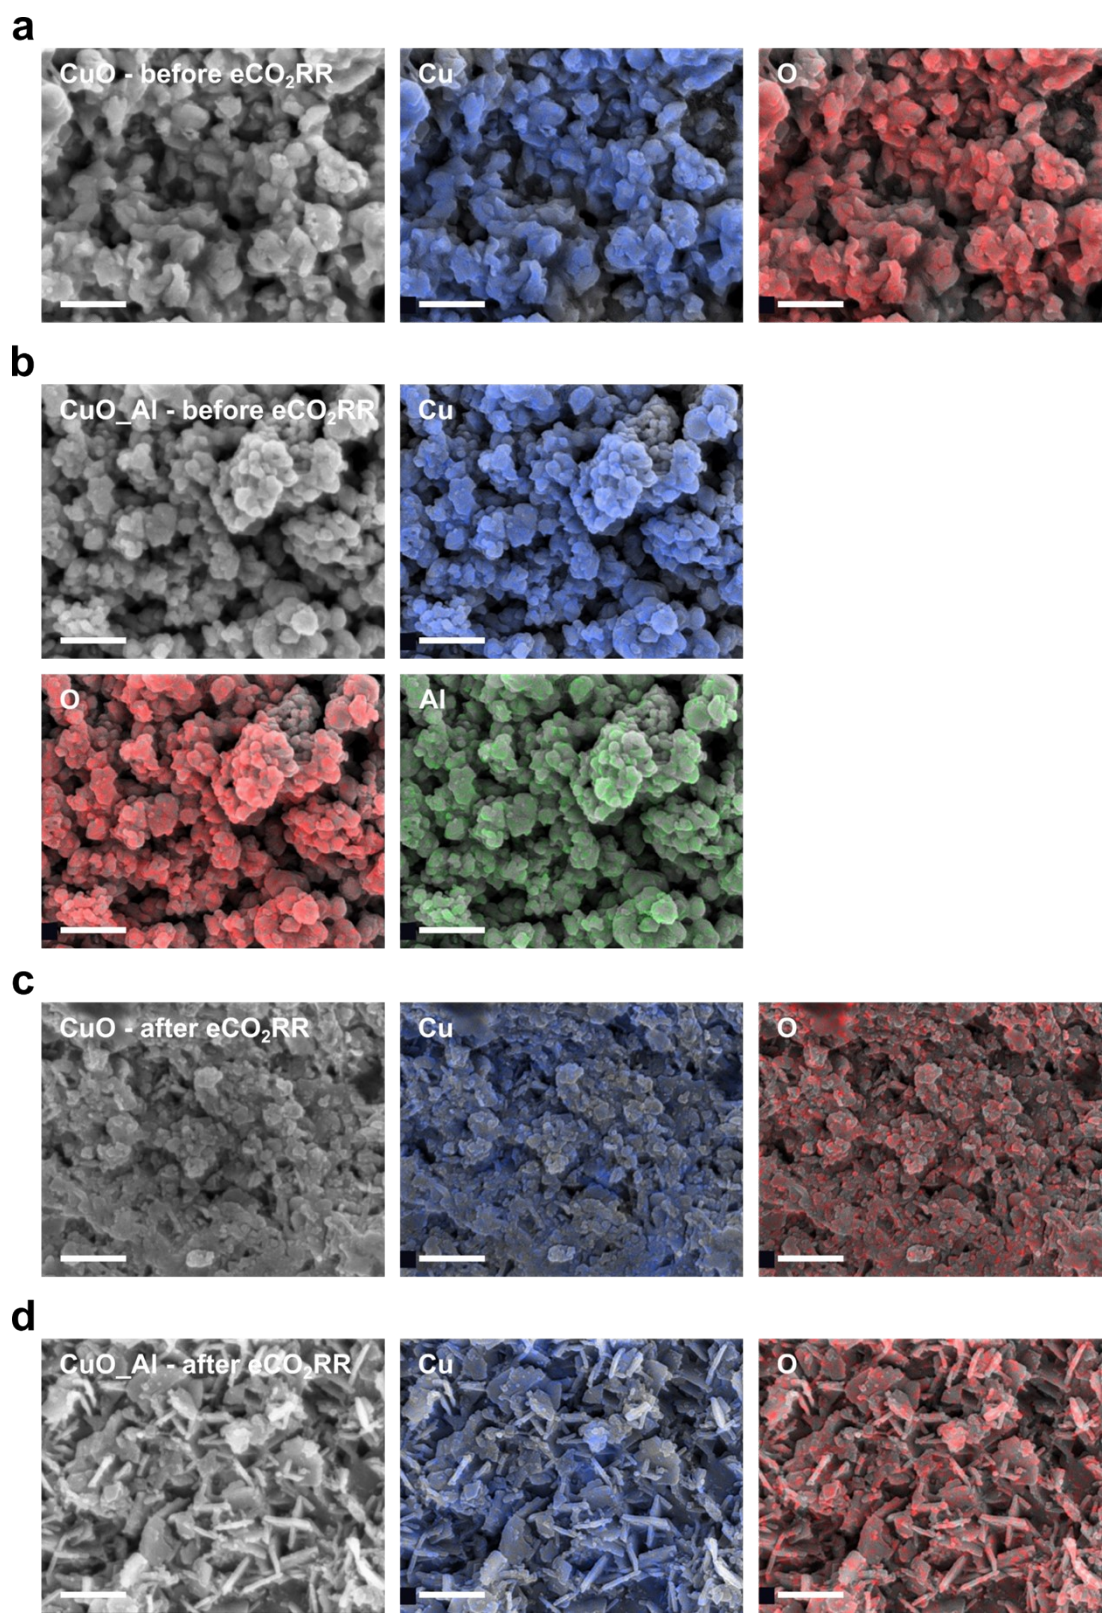

**Figure S14.** SEM images and corresponding EDS mapping images of (a) CuO and (b) CuO<sub>Al</sub> before eCO<sub>2</sub>RR and (c) CuO and (d) CuO<sub>Al</sub> after eCO<sub>2</sub>RR (scale bars: 1 μm).

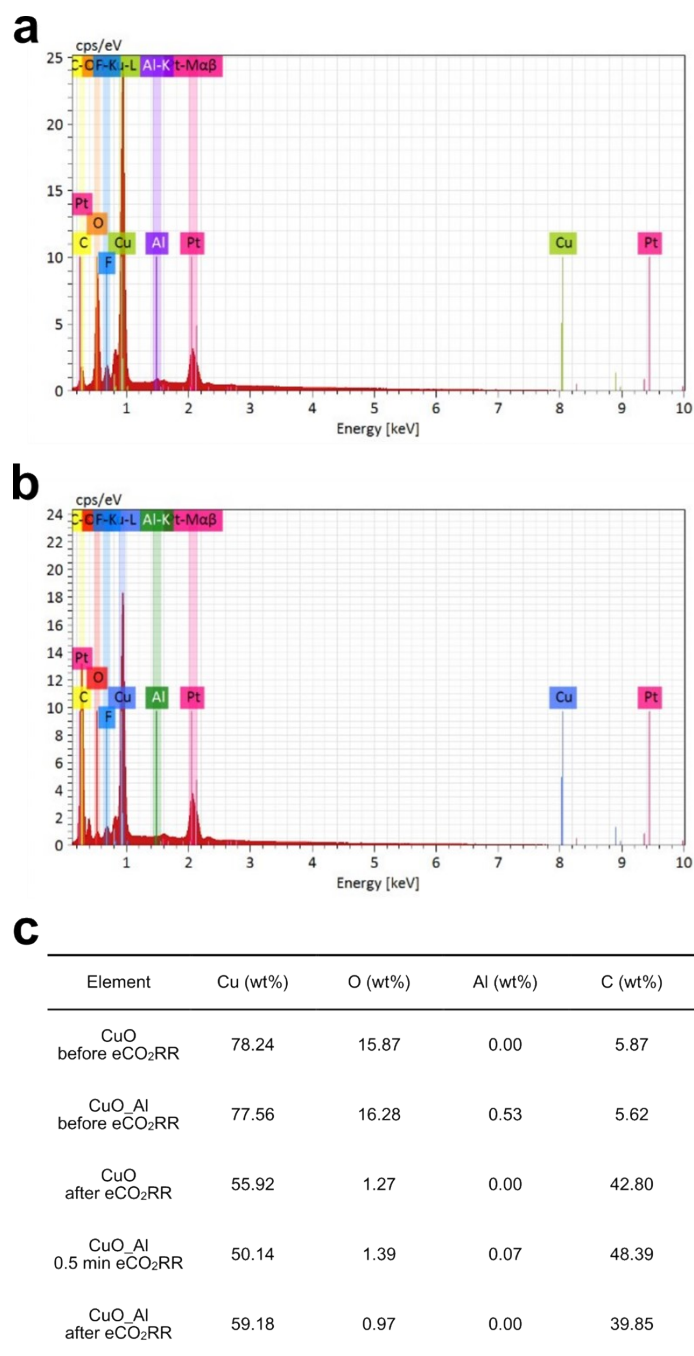

**Figure S15.** EDS spectra of CuO\_Al (a) before eCO<sub>2</sub>RR and (b) after eCO<sub>2</sub>RR from SEM-EDS. (c) Calculated chemical composition of CuO and CuO\_Al before and after eCO<sub>2</sub>RR.

EDS spectra of all samples contain Pt and F. Pt signals come from Pt coating before SEM for high resolution in SEM imaging by high conductivity. F signals come from the PTFE-coated carbon substrate (JNT30-A6H, JNTG Co., Republic of Korea) for high hydrophobicity.



Increased carbon composition after eCO<sub>2</sub>RR comes from BTA adsorption (Cu passivation), and nanoflakes do not consist of carbon due to the high composition of carbon in CuO after eCO<sub>2</sub>RR. The absence of the K signal eliminates the possibility of K<sub>2</sub>CO<sub>3</sub> salt. Therefore, there are no other impurities to explain the formation of nanoflakes.

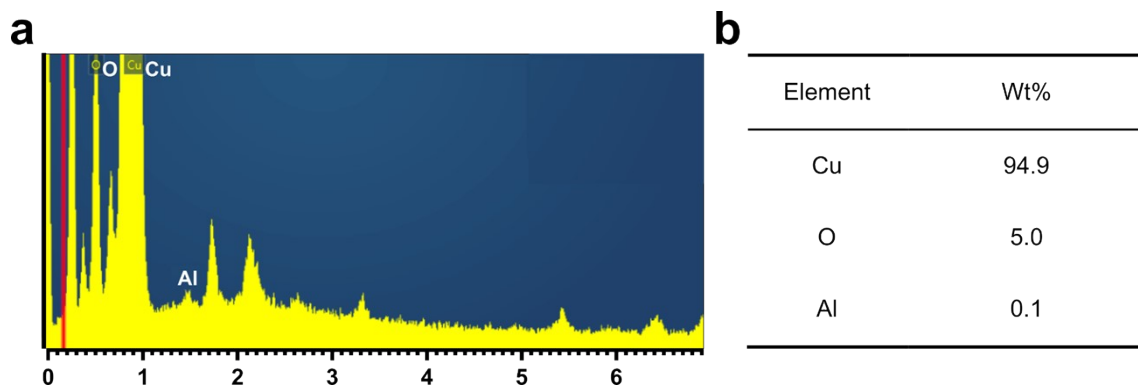

**Figure S16.** (a) EDS spectrum of CuO\_Al after eCO<sub>2</sub>RR from STEM-EDS and (b) its calculated chemical composition.

| Element | 0 min<br>(wt%) | 0.5 min<br>(wt%) | 5 min<br>(wt%) | 60 min<br>(wt%) |
|---------|----------------|------------------|----------------|-----------------|
| Cu      | 99.13          | 99.74            | 99.79          | 99.93           |
| Al      | 0.87           | 0.26             | 0.21           | 0.07            |

**Table S2.** Chemical compositions of Cu and Al in CuO\_Al electrodes during eCO<sub>2</sub>RR for 0, 0.5, 5, and 60 min at 500 mA cm<sup>-2</sup> by ICP-AES.

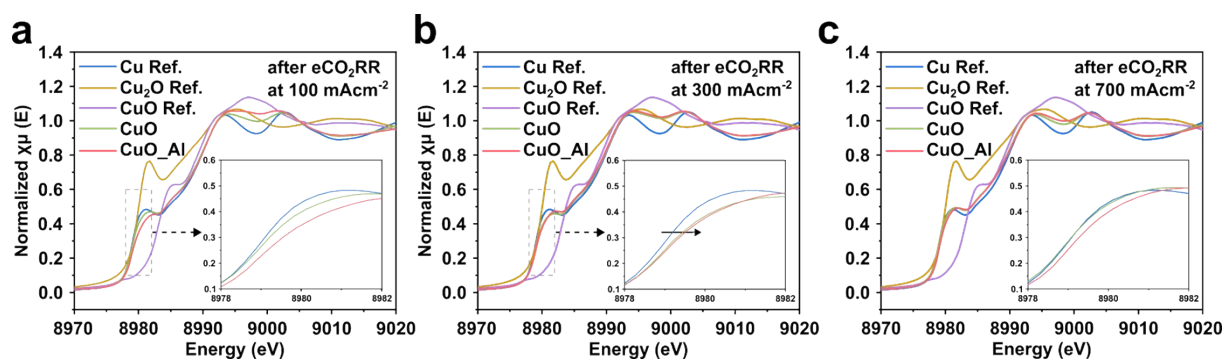

**Figure S17.** Cu K-edge XANES spectra of both catalysts at (a)  $100 \text{ mA cm}^{-2}$ , (b)  $300 \text{ mA cm}^{-2}$ , and (c)  $700 \text{ mA cm}^{-2}$ . The insets magnify the absorption edge of both catalysts at each current density.

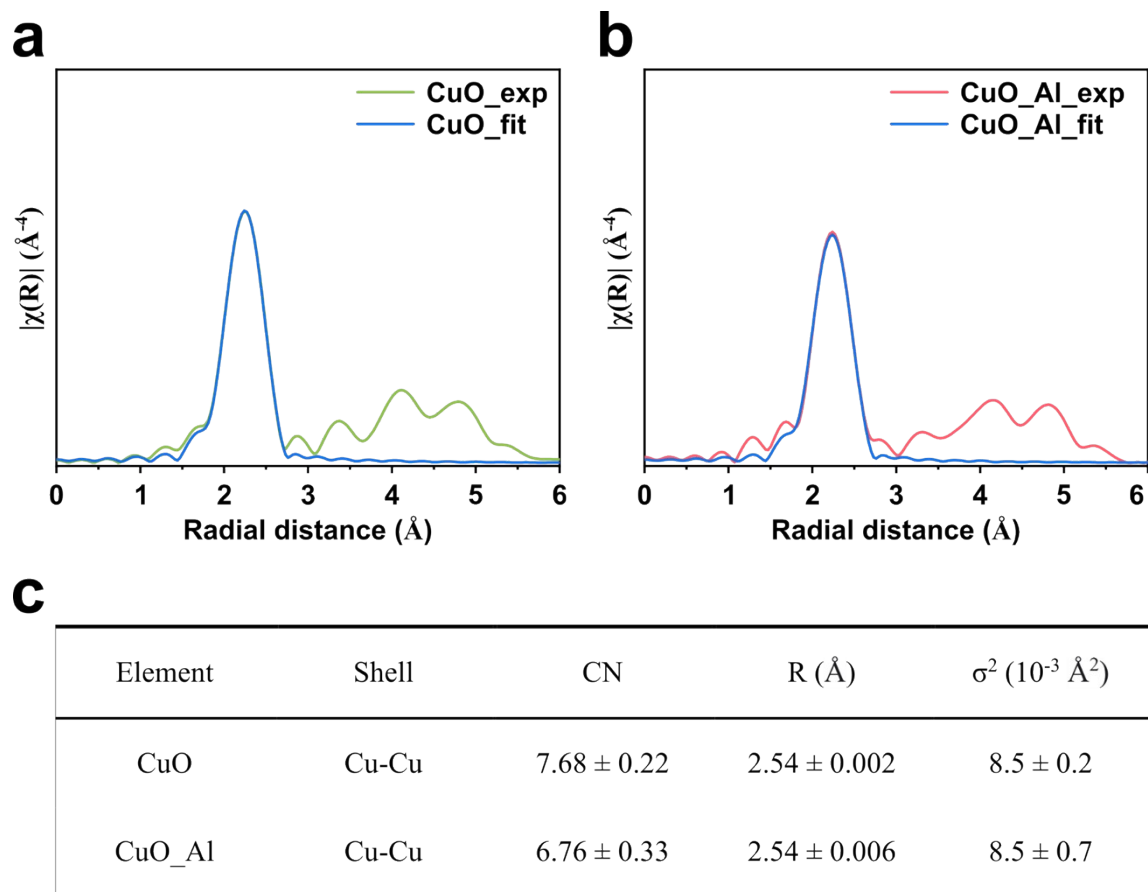

**Figure S18.** Fitting curves for the Cu K-edge FT-EXAFS spectra of (a) CuO and (b) CuO\_Al after eCO<sub>2</sub>RR at 500 mA cm<sup>-2</sup>, and (c) fitting parameters of both catalysts.

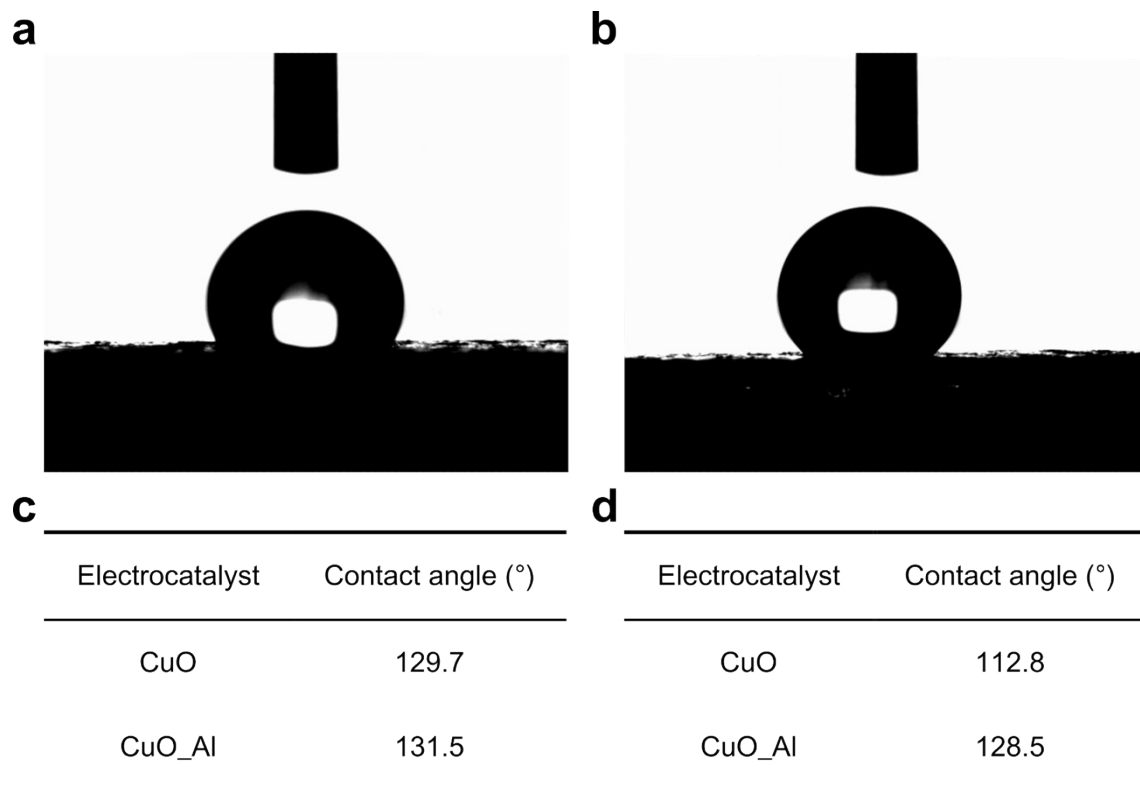

**Figure S19.** Photographs of the droplet on (a) CuO and (b) CuO\_Al electrode before eCO<sub>2</sub>RR for the contact angle determination and measured contact angles of CuO and CuO\_Al (c) before and (d) after eCO<sub>2</sub>RR.

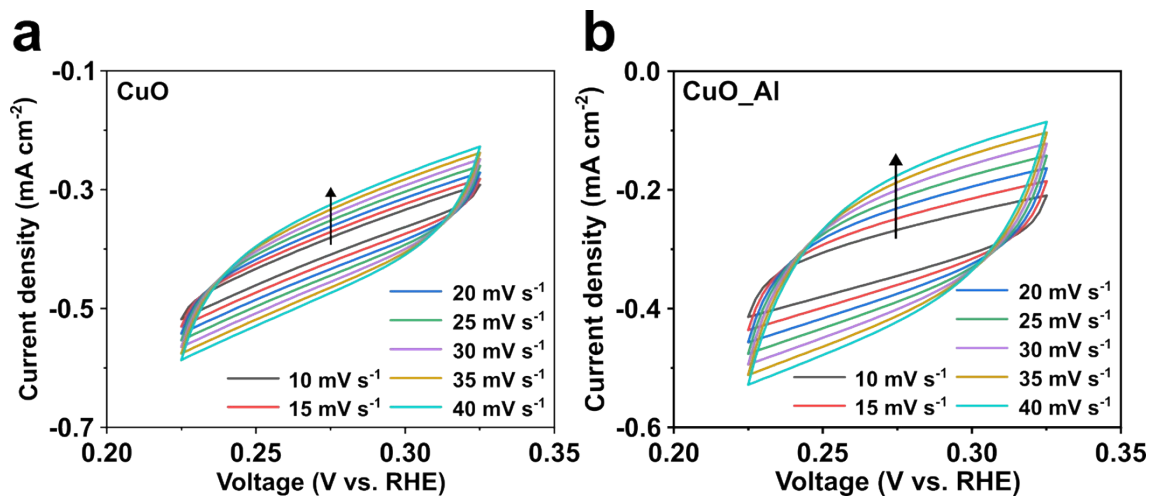

**Figure S20.** CV curves of (a) CuO and (b) CuO\_Al after eCO<sub>2</sub>RR for the determination of double-layer capacitance.

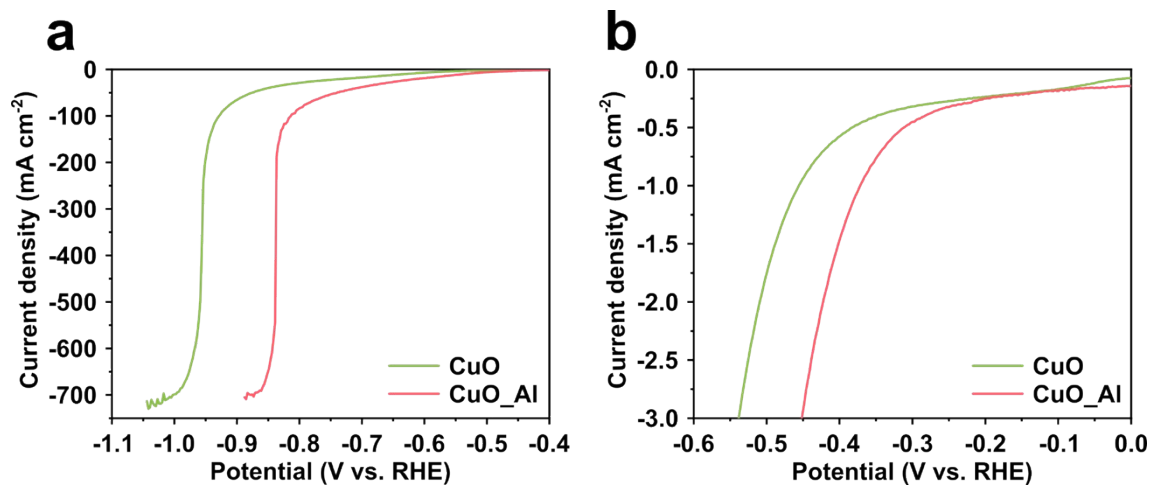

**Figure S21.** LSV curves of both catalysts in the potential range of (a) -0.4 V to -1.1 V (mass transfer limited potential) and (b) 0 V to -0.6 V indicating onset potentials.



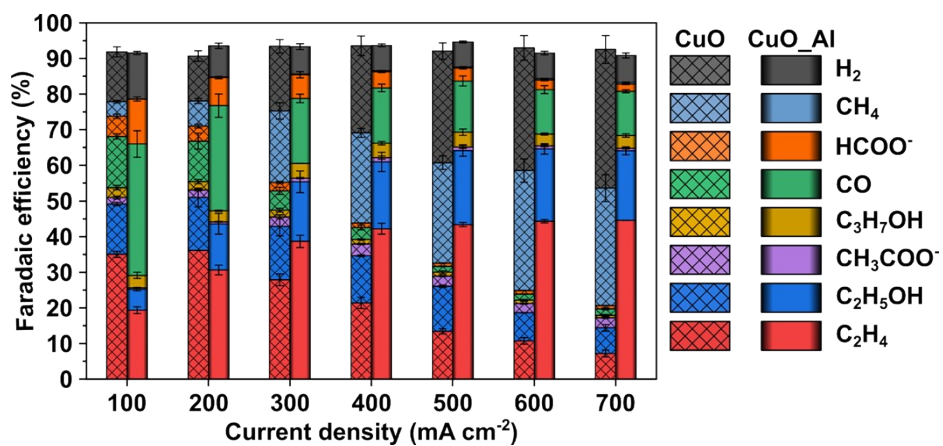

**Figure S22.** Faradaic efficiencies for various products as a function of geometric current density by both catalysts in 1M KHCO<sub>3</sub>. The error bars correspond to the standard deviations calculated from three independent measurements.

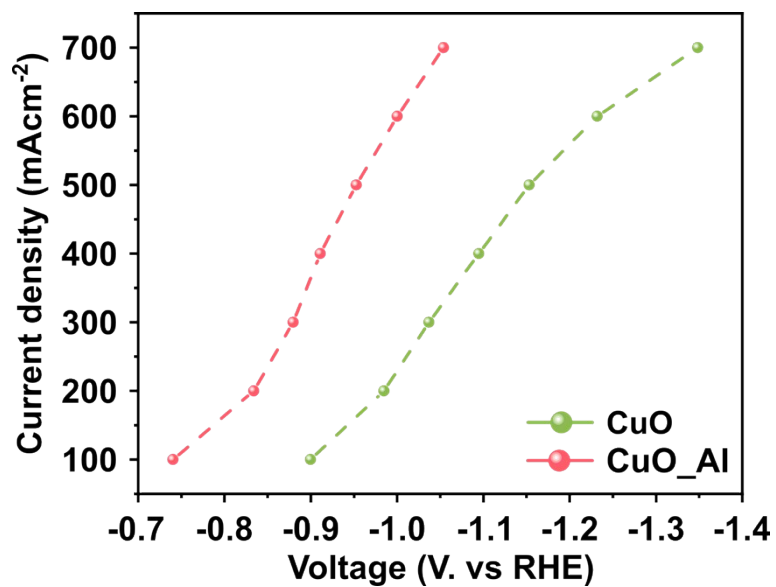

**Figure S23.** The current densities of both catalysts with 100 mA cm<sup>-2</sup> step as a function of potential versus the reversible hydrogen electrode for comparing overpotentials.

**a**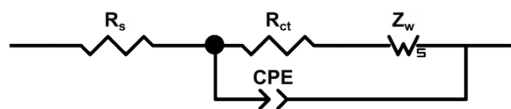**b**

| Electrocatalyst | $R_s$ ( $\Omega$ cm <sup>2</sup> ) | $R_{ct}$ ( $\Omega$ cm <sup>2</sup> ) |
|-----------------|------------------------------------|---------------------------------------|
| CuO             | 9.843                              | 19.61                                 |
| CuO_Al          | 9.473                              | 5.67                                  |

**Figure S24.** (a) Equivalent circuit for fitting the Nyquist plots in Figure 2d and (b) calculated resistances by the fitting.

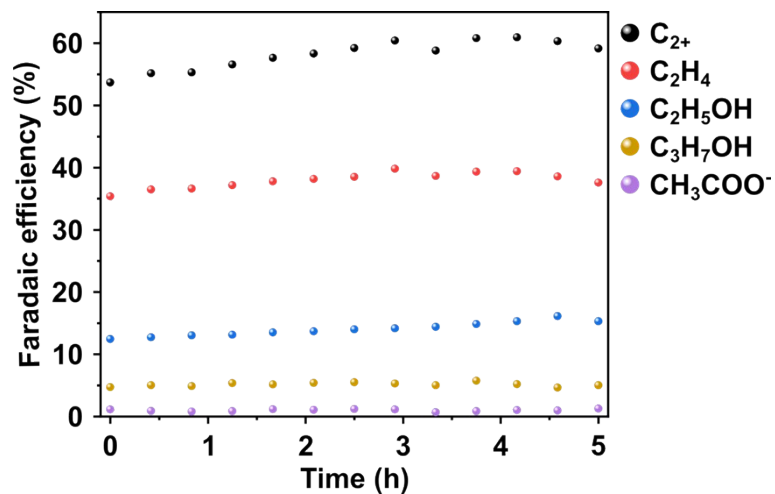

**Figure S25.** Faradaic efficiencies of C<sub>2</sub> products in CuO\_Al long-term electrolysis at the current density of 300 mA cm<sup>-2</sup> for 5 h.

To measure the Faradic efficiencies of C<sub>2</sub> liquid products, electrolytes were sampled in the middle of measurement.

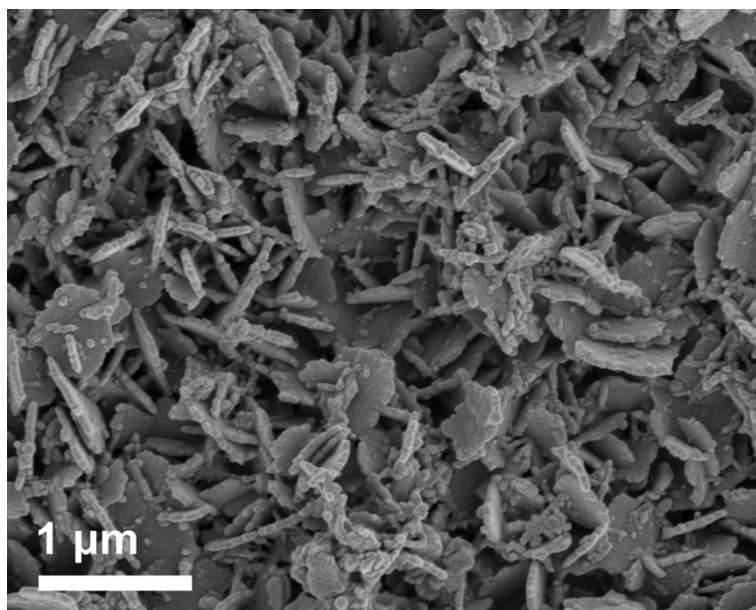

**Figure S26.** SEM image of CuO\_A1 after eCO<sub>2</sub>RR for 5 h.

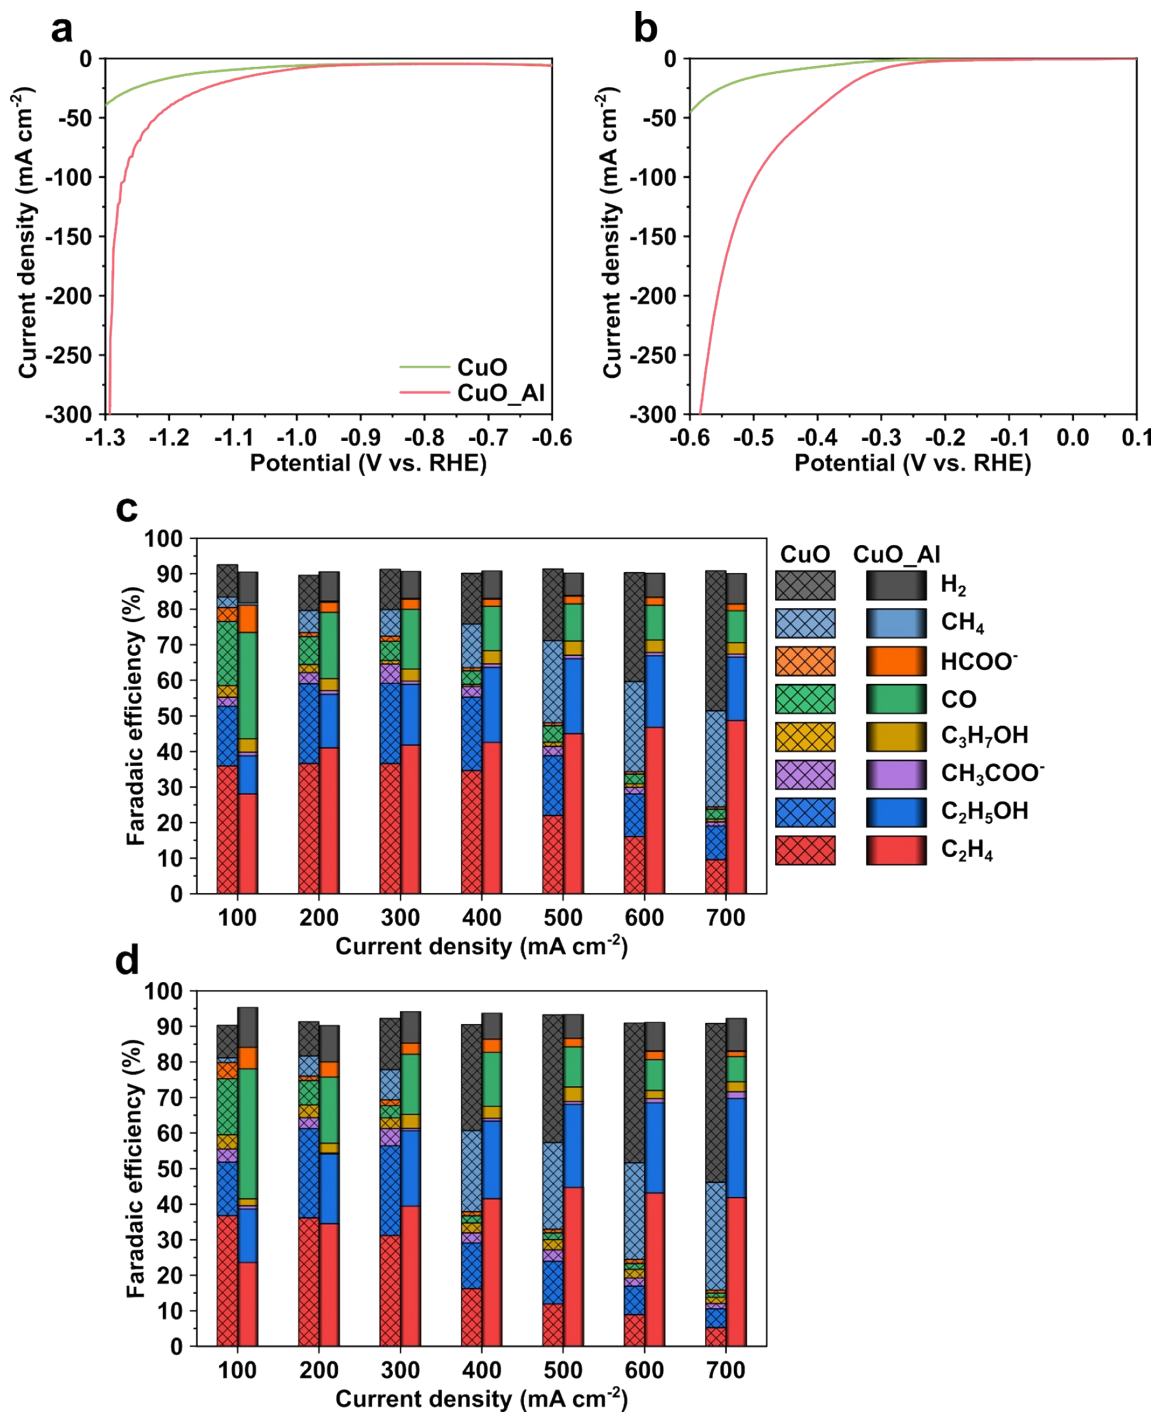

**Figure S27.** Electrocatalytic performance of CuO and CuO<sub>Al</sub> in 0.5 M K<sub>2</sub>SO<sub>4</sub> (pH adjusted to 2.0 with sulfuric acid) and 1 M KOH electrolytes using a flow cell electrolyzer. LSV curves at a scan rate of 10 mV s<sup>-1</sup> in (a) 0.5 M K<sub>2</sub>SO<sub>4</sub> and (b) 1 M KOH electrolytes. Faradaic efficiencies of various products as a function of geometric current density in (c) 0.5 M K<sub>2</sub>SO<sub>4</sub>

and (d) 1 M KOH electrolytes.

FE tendencies of both catalysts in 0.5 M  $K_2SO_4$  and 1 M KOH are similar to FE tendencies of both catalysts in 1 M  $KHCO_3$ .  $C_{2+}$  FE of CuO\_Al increased gradually with current density until 500  $mA\ cm^{-2}$  and  $C_{2+}$  FE of CuO diminished steadily after 200  $mA\ cm^{-2}$ . Also,  $H_2$  and  $C_1$  products FEs of CuO\_Al decrease steadily with current density until 500  $mA\ cm^{-2}$  and  $H_2$  and  $C_1$  products FEs of CuO rise steadily with current density from 200  $mA\ cm^{-2}$ . Remarkably, CuO\_Al showed superior performance in acidic 0.5 M  $K_2SO_4$ . Although bulk electrolyte is acidic, high  $eCO_2RR$  current density induces a mildly alkaline local environment near the cathode, which prevents catalyst dissolution in acidic electrolyte and suppresses hydrogen evolution reaction.<sup>8</sup>

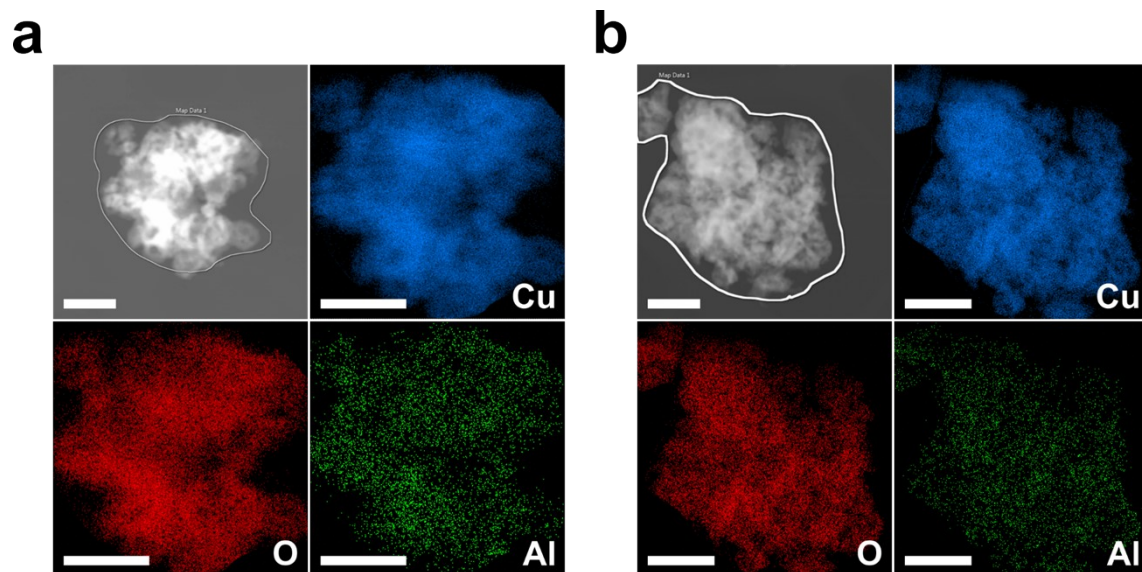

**Figure S28.** TEM images and corresponding EDS mapping images of CuO\_Al with Al(acac)<sub>3</sub> precursor amounts of (a) 0.25 mmol and (b) 0.45 mmol.



| Element | Al(acac) <sub>3</sub><br>0.25 mmol (wt%) | Al(acac) <sub>3</sub><br>0.35 mmol (wt%) | Al(acac) <sub>3</sub><br>0.45 mmol (wt%) |
|---------|------------------------------------------|------------------------------------------|------------------------------------------|
| Cu      | 99.34                                    | 99.19                                    | 99.04                                    |
| Al      | 0.66                                     | 0.81                                     | 0.96                                     |

**Table S3.** Chemical compositions of Cu and Al in CuO<sub>x</sub>Al<sub>y</sub> with different Al(acac)<sub>3</sub> precursor amounts by ICP-AES.

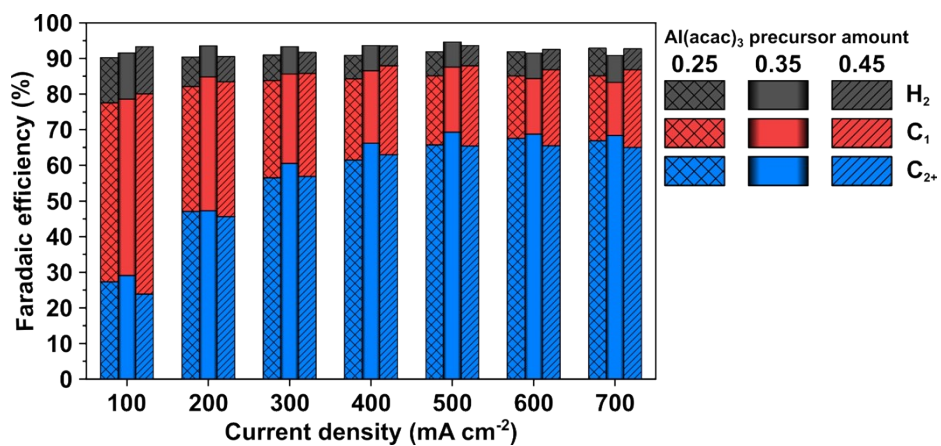

**Figure S29.** Faradaic efficiencies for H<sub>2</sub>, C<sub>1</sub>, and C<sub>2+</sub> products at various current densities by CuO\_Al with different Al(acac)<sub>3</sub> precursor amounts.

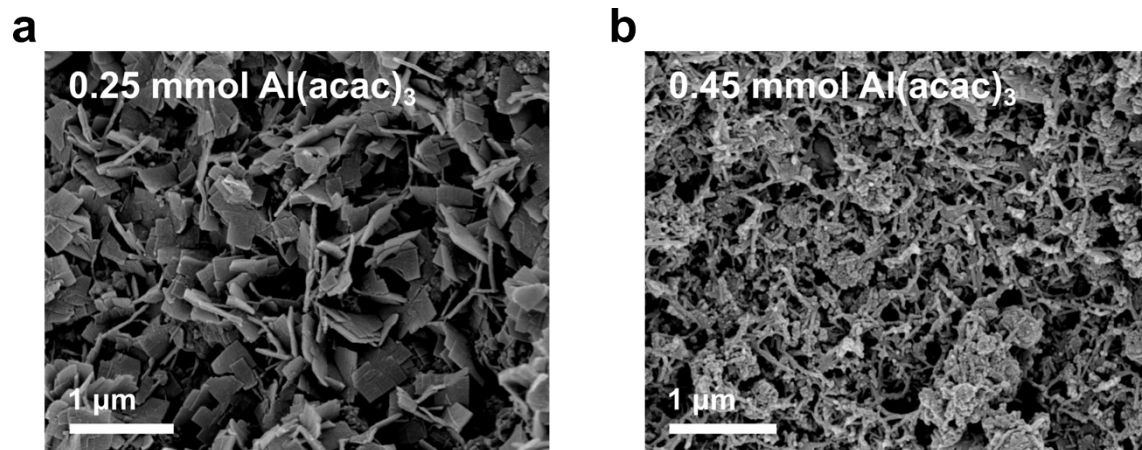

**Figure S30.** SEM images of CuO<sub>2</sub>-Al with Al(acac)<sub>3</sub> precursor amount of (a) 0.25 mmol (b) 0.45 mmol.

## References

1. D. H. Nam, O. S. Bushuyev, J. Li, P. De Luna, A. Seifitokaldani, C. T. Dinh, F. P. Garcia de Arquer, Y. Wang, Z. Liang, A. H. Proppe, C. S. Tan, P. Todorovic, O. Shekhah, C. M. Gabardo, J. W. Jo, J. Choi, M. J. Choi, S. W. Baek, J. Kim, D. Sinton, S. O. Kelley, M. Eddaoudi and E. H. Sargent, *J. Am. Chem. Soc.*, 2018, **140**, 11378-11386.
2. Y. Qiu, J. Zhang, J. Jin, J. Sun, H. Tang, Q. Chen, Z. Zhang, W. Sun, G. Meng, Q. Xu, Y. Zhu, A. Han, L. Gu, D. Wang and Y. Li, *Nat. Commun.*, 2021, **12**, 5273.
3. J. Choi, J. Kim, P. Wagner, S. Gambhir, R. Jalili, S. Byun, S. Sayyar, Y. M. Lee, D. R. MacFarlane, G. G. Wallace and D. L. Officer, *Energy Environ. Sci.*, 2019, **12**, 747-755.
4. C. Zhao, G. Luo, X. Liu, W. Zhang, Z. Li, Q. Xu, Q. Zhang, H. Wang, D. Li, F. Zhou, Y. Qu, X. Han, Z. Zhu, G. Wu, J. Wang, J. Zhu, T. Yao, Y. Li, H. J. M. Bouwmeester and Y. Wu, *Adv. Mater.*, 2020, **32**, e2002382.
5. Y. Li, D. Kim, S. Louisia, C. Xie, Q. Kong, S. Yu, T. Lin, S. Aloni, S. C. Fakra and P. Yang, *Proc. Natl. Acad. Sci. U. S. A.*, 2020, **117**, 9194-9201.
6. P. Sebastián-Pascual and M. Escudero-Escribano, *J. Electroanal. Chem.*, 2021, **896**.
7. D. Wakerley, S. Lamaison, F. Ozanam, N. Menguy, D. Mercier, P. Marcus, M. Fontecave and V. Mougél, *Nat. Mater.*, 2019, **18**, 1222-1227.
8. Y. Xie, P. Ou, X. Wang, Z. Xu, Y. C. Li, Z. Wang, J. E. Huang, J. Wicks, C. McCallum and N. Wang, *Nat. Catal.*, 2022, **5**, 564-570.
